# Supplementary material for: Role of the cytoskeleton in signaling networks
Source: Oxford University Press journal article supplement (doi:10.1242/jcs.01122), 2004-05-25
Supplement: jcs01122suppldata.pdf [file jcs01122suppldata.pdf]

**JCS01122 Role of the cytoskeleton in signaling networks**  
**Supplemental data**

| <b>Cytoskeletal proteins</b> |                  |                                                                           |
|------------------------------|------------------|---------------------------------------------------------------------------|
| <b>ORF Name</b>              | <b>Gene name</b> | <b>Brief characterization</b>                                             |
| YAL020C                      | ATS1             | alpha-tubulin suppressor                                                  |
| YAL029C                      | MYO4             | myosin heavy chain, unconventional (class V) isoform                      |
| YBL007C                      | SLA1             | cytoskeleton assembly control protein                                     |
| YBL037W                      | APL3             | AP-2 complex subunit, alpha-adaptin, 113 KD                               |
| YBL063W                      | KIP1             | kinesin-related protein                                                   |
| YBL085W                      | BOI1             | BEM1 protein-binding protein                                              |
| YBR109C                      | CMD1             | calmodulin                                                                |
| YBR130C                      | SHE3             | required for mother cell-specific expression of HO, interacts with Cdc12p |
| YBR172C                      | SMY2             | kinesin-related protein                                                   |
| YBR200W                      | BEM1             | bud emergence mediator; scaffold protein                                  |
| YBR234C                      | ARC40            | Arp2/3 protein complex subunit, 40 kilodalton                             |
| YCL029C                      | BIK1             | nuclear fusion protein                                                    |
| YCR002C                      | CDC10            | septin; cell division control protein                                     |
| YCR009C                      | RVS161           | similarity to human amphiphysin and Rvs167p                               |
| YCR088W                      | ABP1             | actin-binding protein                                                     |
| YDL022W                      | GPD1             | glycerol-3-phosphate dehydrogenase (NAD <sup>+</sup> ), cytoplasmic       |
| YDL029W                      | ARP2             | actin-like protein                                                        |
| YDL127W                      | PCL2             | cyclin, G1/S-specific                                                     |
| YDL143W                      | CCT4             | component of chaperonin-containing T-complex                              |
| YDL178W                      | AIP2             | actin interacting protein 2                                               |
| YDL179W                      | PCL9             | cyclin like protein interacting with Pho85p                               |
| YDR106W                      | ARP10            | similarity to Actin proteins                                              |
| YDR129C                      | SAC6             | actin filament bundling protein, fimbrin                                  |
| YDR188W                      | CCT6             | component of chaperonin-containing T-complex (zeta subunit)               |
| YDR218C                      | SPR28            | septin-related sporulation protein                                        |
| YDR264C                      | AKR1             | ankyrin repeat-containing protein                                         |
| YDR388W                      | RVS167           | reduced viability upon starvation actin binding protein                   |
| YDR424C                      | DYN2             | dynein light chain 1, cytosolic                                           |
| YDR488C                      | PAC11            | required in the absence of Cin8p                                          |
| YEL061C                      | CIN8             | kinesin-related protein                                                   |
| YER007W                      | PAC2             | involved in the stabilization of microtubules                             |
| YER016W                      | BIM1             | binding to microtubules                                                   |
| YER081W                      | SER3             | 3-phosphoglycerate dehydrogenase                                          |
| YER085C                      | not assigned     | similarity to myosins                                                     |

|         |         |                                                                 |
|---------|---------|-----------------------------------------------------------------|
| YER114C | BOI2    | budding protein; binds BEM1                                     |
| YFL037W | TUB2    | beta-tubulin                                                    |
| YFL039C | ACT1    | actin                                                           |
| YGL206C | CHC1    | clathrin heavy chain                                            |
| YGL216W | KIP3    | kinesin-related protein required for nuclear migration          |
| YGR015W | SPR3    | septin, sporulation, binds Myo1p                                |
| YGR167W | CLC1    | clathrin light chain                                            |
| YGR241C | YAP1802 | Yeast Adaptor Protein, member of AP180 protein family           |
| YGR268C | HUA1    | interacts with Sla1p, Rvs167p                                   |
| YHL007C | STE20   | ser/thr protein kinase of the pheromone pathway                 |
| YHR023W | MYO1    | myosin-1 isoform (type II myosin) heavy chain                   |
| YHR107C | CDC12   | septin                                                          |
| YHR129C | ARP1    | centractin                                                      |
| YHR133C | NSG1    | similarity to hypothetical protein YNL156c, interacts with WASP |
| YHR161C | YAP1801 | Yeast Adaptor Protein, member of AP180 protein family           |
| YIL034C | CAP2    | F-actin capping protein, beta subunit                           |
| YIL062C | ARC15   | subunit of the Arp2/3 complex                                   |
| YIL138C | TPM2    | tropomyosin, isoform 2                                          |
| YIL142W | CCT2    | chaperonin of the TCP1 ring complex, cytosolic                  |
| YIL149C | MLP2    | involved in translocation of macromolecules between the         |
| YIL155C | GUT2    | glycerol-3-phosphate dehydrogenase, mitochondrial               |
| YIL159W | BNR1    | regulator of budding; has similarity to BNI1                    |
| YIR006C | PAN1    | actin-cytoskeleton assembly protein                             |
| YJL008C | CCT8    | component of chaperonin-containing T-complex                    |
| YJL014W | CCT3    | chaperonin of the TCP1 ring complex, cytosolic                  |
| YJL042W | MHP1    | microtubule-associated protein                                  |
| YJL081C | ARP4    | actin-related protein                                           |
| YJL111W | CCT7    | component of chaperonin-containing T-complex                    |
| YJR005W | APL1    | AP-2 complex subunit, beta2-adaptin, 78 KD                      |
| YJR058C | APS2    | AP-2 complex subunit, sigma2 subunit, 17 KD                     |
| YJR064W | CCT5    | T-complex protein 1, epsilon subunit                            |
| YJR065C | ARP3    | actin related protein                                           |
| YJRO76C | CDC11   | septin                                                          |
| YKL007W | CAP1    | F-actin capping protein alpha subunit                           |
| YKL079W | SMY1    | kinesin-related protein                                         |
| YKL129C | MYO3    | myosin type I                                                   |
| YKR054C | DYN1    | dynein heavy chain, cytosolic                                   |
| YLL021W | SPA2    | involved in cell polarity and fusion                            |
| YLL050C | COF1    | cofilin, actin binding and severing protein                     |
| YLR045C | STU2    | suppressor of a cs tubulin mutation                             |

|         |              |                                                                    |
|---------|--------------|--------------------------------------------------------------------|
| YLR085C | ARP6         | Actin-related protein                                              |
| YLR144C | ACF2         | necessary for cortical actin assembly                              |
| YLR212C | TUB4         | gamma tubulin                                                      |
| YLR314C | CDC3         | septin; cell division control protein                              |
| YLR319C | BUD6         | bud site selection protein                                         |
| YLR337C | VRP1         | verprolin                                                          |
| YLR370C | ARC18        | subunit of the Arp2/3 complex                                      |
| YLR423c | APG17        | protein involved in autophagy; binds Myo1p, Rho Tases, exocyst     |
| YLR429W | CRN1         | a coronin, that binds actin and promotes its polymerization        |
| YML085C | TUB1         | alpha-1 tubulin                                                    |
| YML124C | TUB3         | alpha-3 tubulin                                                    |
| YMR092C | AIP1         | actin cytoskeleton component                                       |
| YMR109W | MYO5         | myosin I                                                           |
| YMR183C | SSO2         | syntaxin, T-SNARE, interacts with YAP180, Pan1p                    |
| YNL020C | ARK1         | Actin Regulating Kinase                                            |
| YNL059C | ARP5         | Actin-related protein                                              |
| YNL079C | TPM1         | tropomyosin 1                                                      |
| YNL084C | END3         | required for endocytosis and cytoskeletal organization             |
| YNL094W | APP1         | similarity to S.pombe hypothetical protein, interacts with Rvs167p |
| YNL106C | INP52        | phosphatidylinositol phosphate phosphatase                         |
| YNL138W | SRV2         | adenylate cyclase-associated protein, 70kDa                        |
| YNL223W | AUT2         | essential for autophagy                                            |
| YNL243W | SLA2         | cytoskeleton assembly control protein                              |
| YNL271C | BNI1         | regulator of budding; interacts with Rho GTPases, profilin         |
| YNL293W | MSB3         | similarity to Mic1p and human transforming protein tre-2,          |
| YNL298W | CLA4         | ser/thr protein kinase                                             |
| YOL062C | APM4         | AP-2 complex subunit, mu2 subunit, 55 KD                           |
| YOL086C | ADH1         | alcohol dehydrogenase I                                            |
| YOL112W | MSB4         | similarity to Mic1p and human transforming protein tre-2           |
| YOR058C | ASE1         | microtubule-associated protein (nonmotor)                          |
| YOR084W | not assigned | interacts with Cdc11p                                              |
| YOR122C | PFY1         | profilin                                                           |
| YOR141C | ARP8         | Actin-related protein                                              |
| YOR156C | NFI1         | interacts with Cdc12p in 2-hybrid assay                            |
| YOR181W | LAS17        | component of actin cortical patches; WASP homologue                |
| YOR265W | RBL2         | beta-tubulin binding protein                                       |
| YOR284W | HUA2         | interacts with Abp1, Rvs167, Sla2                                  |
| YOR326W | MYO2         | myosin heavy chain                                                 |
| YOR349W | CIN1         | chromosome segregation protein                                     |
| YPL032C | SVL3         | strong similarity to Pam1p, interacts with coronin                 |

|         |              |                                                                           |
|---------|--------------|---------------------------------------------------------------------------|
| YPL137C | not assigned | similarity to microtubule-interacting protein Mhp1p and to                |
| YPL155C | KIP2         | kinesin-related protein                                                   |
| YPL161C | BEM4         | bud emergence protein; binds eptins, Rho GTPases                          |
| YPL174C | NIP100       | mitotic spindle positioning protein, component of the dynactin complex    |
| YPL232W | SSO1         | syntaxin-related protein, T-SNARE, interacts with YAP180, Pan1p           |
| YPL239W | YAR1         | ankyrin repeat-containing protein                                         |
| YPL242C | IQG1         | involved in cytokinesis, has similarity to mammalian IQGAP                |
| YPL246C | RBD2         | similarity to mouse proteinase activated receptor 2, interacts with Las17 |
| YPR029C | APL4         | AP-1 complex subunit, gamma-adaptin, 94 KD                                |
| YPR141C | KAR3         | kinesin-related protein                                                   |
| YPR171W | BSP1         | interacts with Cap1, Rvs167, Sla1                                         |

| Signaling proteins |              |                                                            |
|--------------------|--------------|------------------------------------------------------------|
| ORF Name           | Gene name    | Brief characterization                                     |
| YAL017W            | FUN31        | similarity to ser/thr protein kinases                      |
| YAL024C            | LTE1         | GDP/GTP exchange factor                                    |
| YAL040C            | CLN3         | cyclin, G1/S-specific                                      |
| YAL041W            | CDC24        | GTP/GDP exchange factor for Cdc42p                         |
| YAL048C            | GON1         | vesicle –mediated transport                                |
| YAR018C            | KIN3         | ser/thr protein kinase                                     |
| YAR019C            | CDC15        | protein kinase of the MAP kinase kinase kinase family      |
| YBL016W            | FUS3         | mitogen-activated protein kinase (MAP kinase)              |
| YBL033C            | RIB1         | GTP cyclohydrolase II                                      |
| YBL056W            | PTC3         | ser/thr protein phosphatase PP2C                           |
| YBL085W            | BOI1         | BEM1 protein-binding protein                               |
| YBL088C            | TEL1         | telomere length control protein                            |
| YBL105C            | PKC1         | ser/thr protein kinase                                     |
| YBL106C            | SRO77        | Suppressor of defect in the small GTPase Rho3p             |
| YBR036C            | CSG2         | calcium dependent regulatory protein                       |
| YBR059             | AKL1         | Ark-family Kinase-Like protein                             |
| YBR097W            | VPS15        | ser/thr protein kinase                                     |
| YBR102C            | EXO84        | exocyst protein essential for secretion                    |
| YBR109C            | CMD1         | calmodulin                                                 |
| YBR125C            | PTC4         | serine/threonine protein phosphatases (PP2Cs)              |
| YBR133C            | HSL7         | adapter in a regulatory pathway that relieves tyrosine     |
| YBR136W            | MEC1         | cell cycle checkpoint protein                              |
| YBR140C            | IRA1         | inhibitory regulator protein of the ras-cyclic AMP pathway |
| YBR160W            | CDC28        | cyclin-dependent protein kinase                            |
| YBR164C            | ARL1         | ADP-ribosylation factor                                    |
| YBR179C            | FZO1         | required for biogenesis of mitochondria                    |
| YBR200W            | BEM1         | bud emergence mediator                                     |
| YBR228W            | SLX1         | similarity to hypothetical A.thaliana protein              |
| YBR260C            | RGD1         | similarity to C.elegans GTPase-activating protein          |
| YBR267W            | not assigned | similarity to hypothetical protein YLR387c                 |
| YBR274W            | CHK1         | regulates inhibitory Cdk phosphorylation of Pds1           |
| YBR275C            | RIF1         | RAP1-interacting factor 1                                  |
| YCL004W            | PGS1         | phosphatidylglycerophosphate synthase                      |
| YCL024             | KCC4         | kinase coordinate cell cycle progression with the          |

|         |              |                                                                   |
|---------|--------------|-------------------------------------------------------------------|
| YCL032W | STE50        | pheromone response pathway protein                                |
| YCR008W | SAT4         | serine/threonine-specific protein kinase                          |
| YCR027C | RSG1         | rheb-like Gene involved in growth regulation                      |
| YCR038C | BUD5         | GDP/GTP exchange factor for Rsr1p/Bud1p                           |
| YCR072C | not assigned | strong similarity to <i>S. pombe</i> trp-asp repeat containing    |
| YCR073C | SSK22        | MAP kinase kinase kinase                                          |
| YCR086w | CSM1         | involved in nuclear migration                                     |
| YCR091W | KIN82        | ser/thr protein kinase                                            |
| YDL006W | PTC1         | protein serine/threonine phosphatase 2c                           |
| YDL017W | CDC7         | protein kinase                                                    |
| YDL025C | not assigned | similarity to probable protein kinase NPR1                        |
| YDL028C | MPS1         | serine/threonine/tyrosine protein kinase                          |
| YDL047W | SIT4         | ser/thr protein phosphatase                                       |
| YDL077C | VPS39/VAM6   | vacuolar carboxypeptidase Y                                       |
| YDL079C | MRK1         | ser/thr protein kinase                                            |
| YDL101C | DUN1         | protein kinase                                                    |
| YDL107W | MSS2         | ser/thr protein kinase                                            |
| YDL108W | KIN28        | cyclin-dependent ser/thr protein kinase                           |
| YDL125C | HNT1         | similarity to protein kinase C inhibitor-I                        |
| YDL127W | PCL2         | cyclin, G1/S-specific                                             |
| YDL132W | CDC53        | controls G1/S transition                                          |
| YDL135C | RDI1         | rho GDP dissociation inhibitor with activity toward Rho1p         |
| YDL137W | ARF2         | GTP-binding protein of the ARF family                             |
| YDL159W | STE7         | Serine/threonine/tyrosine protein kinase of the pheromone pathway |
| YDL192W | ARF1         | small GTP-binding protein of the ARF family                       |
| YDL194W | SNF3         | high-affinity glucose transporter/regulatory protein              |
| YDL214C | PRR2         | strong similarity to putative protein kinase NPR1                 |
| YDL226C | GCS1         | ADP-ribosylation factor GTPase-activating protein (ARF-GAP)       |
| YDL230W | PTP1         | protein tyrosine phosphatase                                      |
| YDL234C | GYP7         | GTPase-activating protein for Ypt7p                               |
| YDL240W | LRG1         | GTPase-activating protein of the rho/rac family                   |
| YDR002W | YRB1         | ran-specific GTPase-activating protein                            |
| YDR054C | CDC34        | E2 ubiquitin-conjugating enzyme                                   |
| YDR103W | STE5         | pheromone signal transduction pathway protein                     |
| YDR122W | KIN1         | ser/thr protein kinase                                            |
| YDR137W | RGP1         | reduced growth phenotype protein                                  |
| YDR226W | ADK1         | adenylate kinase, cytosolic                                       |
| YDR238C | SEC26        | coatamer complex beta chain of secretory pathway vesicles         |
| YDR247W | VHS1         | protein serine/threonine kinase activity                          |
| YDR283C | GCN2         | ser/thr protein kinase                                            |

|         |              |                                                                      |
|---------|--------------|----------------------------------------------------------------------|
| YDR309C | GIC2         | Cdc42 GTPase-binding protein                                         |
| YDR373W | FRQ1         | regulator of phosphatidylinositol-4-OH kinase protein                |
| YDR379W | RGA2         | similarity to Dbm1p and to the rat GAP-associated protein            |
| YDR454C | GUK1         | guanylate kinase                                                     |
| YDR466W | not assigned | protein kinase activity                                              |
| YDR477W | SNF1         | carbon catabolite derepressing ser/thr protein kinase                |
| YDR490C | PKH1         | ser/thr protein kinases                                              |
| YDR507C | GIN4         | ser/thr protein kinase                                               |
| YDR523C | SPS1         | ser/thr protein kinase                                               |
| YDR524C | AGE1         | similarity to ADP-ribosylation factor (ARF) GTPase                   |
| YEL022W | GEA2         | GDP/GTP exchange factor for ARF                                      |
| YEL043W | not assigned | weak similarity to Mad1p                                             |
| YER031C | YPT31        | GTP-binding protein of the rab family                                |
| YER075C | PTP3         | protein tyrosine phosphatase                                         |
| YER086W | ILV1         | anabolic serine and threonine dehydratase precursor                  |
| YER096W | SHC1         | sporulation specific protein                                         |
| YER110C | KAP123       | RAN-binding protein                                                  |
| YER114C | BOI2         | budding protein                                                      |
| YER118C | SHO1         | involved in the HOG1 high-osmolarity signal transduction             |
| YER123W | YCK3         | casein kinase, isoform 3                                             |
| YER124C | DSE1         | weak similarity to Dictyostelium WD40 repeat protein 2               |
| YER129W | PAK1         | DNA polymerase alpha suppressing protein kinase                      |
| YER136W | GDI1         | GDP dissociation inhibitor                                           |
| YER155C | BEM2         | GTPase-activating protein                                            |
| YER167W | BCK2         | suppressor of mutations in protein kinase C pathway                  |
| YER170W | ADK2         | adenylate kinase, mitochondrial                                      |
| YER177W | BMH1         | 14-3-3 protein involved in rapamycin-sensitive signalling            |
| YFL005W | SEC4         | GTP-binding protein of the ras superfamily                           |
| YFL009W | CDC47        | cell division control protein                                        |
| YFL026W | STE2         | pheromone alpha-factor receptor                                      |
| YFL027C | GYP8         | weak similarity to P.falciparum Pfmdr2 protein                       |
| YFL029C | CAK1         | cdk-activating protein kinase                                        |
| YFL031W | HAC1         | transcription factor                                                 |
| YFL033C | RIM15        | protein kinase involved in expression of meiotic genes               |
| YFL038C | YPT1         | GTP-binding protein of the rab family                                |
| YFL047W | RGD2         | GTPase activating protein                                            |
| YFR014C | CMK1         | Ca <sup>2+</sup> /calmodulin-dependent ser/thr protein kinase type I |
| YFR019W | FAB1         | phosphatidylinositol 3-phosphate 5-kinase                            |
| YFR028C | CDC14        | dual specificity phosphatase                                         |
| YGL006W | PMC1         | calcium-transporting ATPase activity                                 |

|         |              |                                                             |
|---------|--------------|-------------------------------------------------------------|
| YGL019W | CKB1         | casein kinase II, beta subunit                              |
| YGL059W | not assigned | protein kinase activity                                     |
| YGL097W | SRM1         | GDP/GTP exchange factor for Gsp1p/Gsp2p                     |
| YGL099W | KRE35        | similarity to putative human GTP-binding protein MMR1       |
| YGL126W | SCS3         | inositol phospholipid synthesis protein                     |
| YGL158W | RCK1         | ser/thr protein kinase                                      |
| YGL167C | PMR1         | Ca <sup>2+</sup> -transporting P-type ATPase                |
| YGL179C | TOS3         | strong similarity to Pak1p, Elm1p and Kin82p                |
| YGL180W | APG1         | essential for autophagocytosis                              |
| YGL190C | CDC55        | ser/thr phosphatase 2A regulatory subunit B                 |
| YGL227W | VID30        | weak similarity to human RANBPM NP_005484.1                 |
| YGL233W | SEC15        | vesicular traffic control protein                           |
| YGR014W | MSB2         | multicopy suppressor of a cdc24 bud emergence defect        |
| YGR040W | KSS1         | ser/thr protein kinase of the MAP kinase family             |
| YGR049W | SCM4         | cdc4 suppressor                                             |
| YGR052W | not assigned | similarity to ser/thr protein kinases                       |
| YGR070W | ROM1         | GDP/GTP exchange protein for Rho1p                          |
| YGR080W | TWF1         | twinfilin, an actin monomer sequestering protein            |
| YGR092W | DBF2         | ser/thr protein kinase related to Dbf20p                    |
| YGR100W | GYP2         | GTPase activating protein                                   |
| YGR134W | CAF130       | hypothetical protein                                        |
| YGR152C | RSR1         | GTP-binding protein                                         |
| YGR172C | YIP1         | golgi membrane protein                                      |
| YGR188C | BUB1         | ser/thr protein kinase                                      |
| YGR217W | CCH1         | calcium channel protein                                     |
| YGR221C | TOS2         | similarity to hypothetical protein YHR149c                  |
| YGR262C | BUD32        | weak similarity to protein kinases and M.jannaschii         |
| YGR267C | FOL2         | GTP cyclohydrolase I                                        |
| YHL007C | STE20        | ser/thr protein kinase of the pheromone pathway             |
| YHR005C | GPA1         | GTP-binding protein alpha subunit of the pheromone pathway  |
| YHR022C | not assigned | weak similarity to ras-related protein                      |
| YHR030C | SLT2         | ser/thr protein kinase of MAP kinase family                 |
| YHR061C | GIC1         | Cdc42 GTPase-binding protein                                |
| YHR070W | TRM5         | strong similarity to N.crassa met-10+ protein               |
| YHR079C | IRE1         | protein kinase                                              |
| YHR082C | KSP1         | ser/thr protein kinase                                      |
| YHR102W | KIC1         | ser/thr protein kinase that interacts with Cdc31p           |
| YHR135C | YCK1         | casein kinase I isoform                                     |
| YHR149C | not assigned | similarity to hypothetical protein YGR221c                  |
| YHR205W | SCH9         | serine/threonine protein kinase involved in stress response |



|         |              |                                                            |
|---------|--------------|------------------------------------------------------------|
| YIL002C | INP51        | phosphatidylinositol phosphate 5-phosphatase               |
| YIL007C | NAS2         | ubiquitin-dependent protein catabolism                     |
| YIL033C | BCY1         | cAMP dependent protein kinase, regulatory subunit          |
| YIL035C | CKA1         | casein kinase II, catalytic alpha chain                    |
| YIL042C | not assigned | kinase activity                                            |
| YIL068C | SEC6         | exocyst complex                                            |
| YIL095W | PRK1         | serine/threonine protein kinase involved in regulation of  |
| YIL118W | RHO3         | GTP-binding protein of the rho family                      |
| YIL119C | RPI1         | negative regulator of ras-cAMP pathway                     |
| YIL147C | SLN1         | two-component signal transducer                            |
| YIL159W | BNR1         | regulator of budding                                       |
| YIR026C | YVH1         | protein tyrosine phosphatase                               |
| YJL005W | CYR1         | adenylate cyclase                                          |
| YJL006C | CTK2         | carboxy-terminal domain (CTD) kinase, beta subunit         |
| YJL044C | GYP6         | GTPase-activating protein                                  |
| YJL085W | EXO70        | 70 kDa exocyst component protein                           |
| YJL089W | SIP4         | interacts with SNF1 protein kinase                         |
| YJL095W | BCK1         | ser/thr protein kinase of the MEKK family                  |
| YJL106W | IME2         | ser/thr protein kinase                                     |
| YJL128C | PBS2         | tyrosine protein kinase of the MAP kinase kinase family    |
| YJL141C | YAK1         | ser/thr protein kinase                                     |
| YJL157C | FAR1         | cyclin-dependent kinase inhibitor (CKI)                    |
| YJL164C | TPK1         | cAMP-dependent protein kinase 1, catalytic chain           |
| YJL165C | HAL5         | ser/thr protein kinase                                     |
| YJL187C | SWE1         | ser/tyr dual-specificity protein kinase                    |
| YJR031C | GEA1         | GDP/GTP exchange factor for ARF                            |
| YJR059W | PTK2         | involved in polyamine uptake                               |
| YJR061W | not assigned | similarity to Mnn4p                                        |
| YJR066W | TOR1         | phosphatidylinositol 3-kinase                              |
| YJR086W | STE18        | GTP-binding protein gamma subunit of the pheromone pathway |
| YKL048C | ELM1         | ser/thr-specific protein kinase                            |
| YKL067W | YNK1         | nucleoside diphosphate kinase                              |
| YKL092C | BUD2         | GTPase-activating protein for Bud1p/Rsr1p                  |
| YKL101W | HSL1         | ser/thr protein kinase, coupling septin ring assembly to   |
| YKL116C | PRR1         | similarity to rat SNF1, C elegans unc-51, Dun1p and other  |
| YKL126W | YPK1         | ser/thr-specific protein kinase                            |
| YKL139W | CTK1         | carboxy-terminal domain (CTD) kinase, alpha subunit        |
| YKL161C | MLP1         | strong similarity to ser/thr-specific protein kinase Slr2p |
| YKL166C | TPK3         | cAMP-dependent protein kinase 3, catalytic chain           |
| YKL168C | KKQ8         | ser/thr protein kinase                                     |

|         |              |                                                           |
|---------|--------------|-----------------------------------------------------------|
| YKL171W | not assigned | protein kinase activity                                   |
| YKL178C | STE3         | pheromone a-factor receptor                               |
| YKL190W | CNB1         | calcineurin B, regulatory subunit                         |
| YKL198C | PTK1         | polyamine transport enhancing protein                     |
| YKL203C | TOR2         | phosphatidylinositol 3-kinase                             |
| YKR001C | VPS1         | member of the dynamin family of GTPases                   |
| YKR014C | YPT52        | GTP-binding protein of the rab family                     |
| YKR031C | SPO14        | phospholipase D                                           |
| YKR055W | RHO4         | GTP-binding protein of the rho family                     |
| YKR240W | YKR2         | protein kinase                                            |
| YLL016W | SDC25        | GDP/GTP exchange factor (GEF)                             |
| YLL019C | KNS1         | ser/thr protein kinase                                    |
| YLL021W | SPA2         | involved in cell polarity                                 |
| YLR006C | SSK1         | two-component signal transducer                           |
| YLR039C | RIC1         | involved in transcription of ribosomal proteins and       |
| YLR063W | not assigned | ser/thr protein kinase                                    |
| YLR096W | KIN2         | ser/thr protein kinase                                    |
| YLR113W | HOG1         | ser/thr protein kinase of MAP kinase (MAPK) family        |
| YLR178C | TFS1         | cdc25-dependent nutrient- and ammonia-response cell-cycle |
| YLR206W | ENT2         | clathrin binding protein, required for endocytosis        |
| YLR229C | CDC42        | GTP-binding protein of RAS superfamily                    |
| YLR240W | VPS34        | phosphatidylinositol 3-kinase                             |
| YLR248W | RCK2         | Ca/calmodulin-dependent ser/thr protein kinase            |
| YLR262C | YPT6         | GTP-binding protein of the rab family                     |
| YLR289W | GUF1         | strong similarity to E. coli elongation factor-type       |
| YLR293C | GSP1         | GTP-binding protein of the ras superfamily                |
| YLR305C | STT4         | phosphatidylinositol-4-kinase                             |
| YLR310C | CDC25        | GDP/GTP exchange factor for Ras1p and Ras2p               |
| YLR362W | STE11        | ser/thr protein kinase of the MEKK family                 |
| YLR371W | ROM2         | GDP/GTP exchange factor for Rho1p                         |
| YLR423c | APG17        | protein involved in autophagy                             |
| YLR433C | CNA1         | calcineurin B, catalytic subunit                          |
| YLR452C | SST2         | involved in desensitization to alpha-factor pheromone     |
| YML001W | YPT7         | GTP-binding protein of the RAB family                     |
| YML016C | PPZ1         | ser/thr phosphatase required for normal osmoregulation    |
| YML057W | CMP2         | calcineurin B, catalytic subunit                          |
| YML059C | not assigned | hydrolase activity                                        |
| YML064C | TEM1         | GTP-binding protein of the RAS superfamily                |
| YML097C | VPS9         | vacuolar sorting protein                                  |
| YML109W | ZDS2         | multicopy suppressor of sin4                              |

|         |              |                                                              |
|---------|--------------|--------------------------------------------------------------|
| YML112W | CTK3         | carboxy-terminal domain (CTD) kinase, gamma subunit          |
| YML121W | GTR1         | GTP-binding protein                                          |
| YMR001C | CDC5         | involved in regulation of DNA replication                    |
| YMR016C | SOK2         | regulatory protein in the PKA signal transduction pathway    |
| YMR028W | TAP42        | component of the Tor signaling pathway                       |
| YMR032W | HOF1         | involved in cytokinesis                                      |
| YMR055C | BUB2         | cell cycle arrest protein                                    |
| YMR079W | SEC14        | phosphatidylinositol(PI)/phosphatidylcholine(PC) transfer    |
| YMR104C | YPK2         | ser/thr protein kinase                                       |
| YMR138W | CIN4         | GTP-binding protein                                          |
| YMR139W | RIM11        | ser/thr protein kinase                                       |
| YMR192W | APP2         | similarity to mouse Tbc1 protein                             |
| YMR199W | CLN1         | cyclin, G1/S-specific                                        |
| YMR216C | SKY1         | similarity to S.pombe dsk1, human SRPK1 and other protein    |
| YMR235C | RNA1         | GTPase activating protein                                    |
| YMR238W | DFG5         | required for filamentous growth, cell polarity, and cellular |
| YMR273C | ZDS1         | involved in negative regulation of cell polarity             |
| YMR291W | not assigned | protein kinase activity                                      |
| YNL020C | ARK1         | Actin Regulating Kinase                                      |
| YNL053W | MSG5         | dual-specificity protein phosphatase                         |
| YNL076W | MKS1         | pleiotropic regulatory factor                                |
| YNL087W | not assigned | weak similarity to synaptogamins                             |
| YNL090W | RHO2         | GTP-binding protein of the RHO subfamily of RAS-like         |
| YNL093W | YPT53        | GTP-binding protein of the RAB family (RAS superfamily)      |
| YNL094W | APP1         | similarity to S.pombe hypothetical protein                   |
| YNL098C | RAS2         | GTP-binding protein                                          |
| YNL106C | INP52        | phosphatidylinositol phosphate phosphatase                   |
| YNL128W | TEP1         | weak similarity to tensin and to the mammalian tumor         |
| YNL138W | SRV2         | adenylate cyclase-associated protein, 70kDa                  |
| YNL154C | YCK2         | casein kinase I isoform                                      |
| YNL161W | CBK1         | strong similarity to U.maydis Ukc1p protein kinase           |
| YNL169C | PSD1         | phosphatidylserine decarboxylase 1                           |
| YNL173C | MDG1         | GTP-binding protein of the pheromone-response pathway        |
| YNL180C | RHO5         | similarity to S.pombe Cdc42p and other GTP-binding proteins  |
| YNL183C | NPR1         | ser/thr protein kinase                                       |
| YNL233W | BNI4         | bud neck involved                                            |
| YNL267W | PIK1         | phosphatidylinositol 4-kinase                                |
| YNL271C | BNI1         | regulator of budding                                         |
| YNL272C | SEC2         | GDP/GTP exchange factor                                      |
| YNL293W | MSB3         | similarity to Mic1p and human transforming protein tre-2,    |

|         |              |                                                                        |
|---------|--------------|------------------------------------------------------------------------|
| YNL298W | CLA4         | ser/thr protein kinase                                                 |
| YNL307C | MCK1         | ser/thr/tyr protein kinase                                             |
| YNR026C | SEC12        | GDP/GTP exchange factor for Sar1p                                      |
| YNR031C | SSK2         | MAP kinase kinase kinase of the high osmolarity signal                 |
| YNR047W | not assigned | similarity to ser/thr protein kinases                                  |
| YOL016C | CMK2         | Ca <sup>2+</sup> /calmodulin-dependent ser/thr protein kinase, type II |
| YOL021C | DIS3         | 3'→5' exoribonuclease required for 3' end formation of 5.8S            |
| YOL045W | not assigned | similarity to ser/thr protein kinase                                   |
| YOL081W | IRA2         | GTPase-activating protein for RAS proteins                             |
| YOL100W | PKH2         | similarity to ser/thr protein kinases                                  |
| YOL110W | SHR5         | RAS suppressor                                                         |
| YOL112W | MSB4         | similarity to Mic1p and human transforming protein trc-2               |
| YOL113W | SKM1         | Ste20/PAK-like protein kinase                                          |
| YOL128C | YGK3         | Yeast homologue of mammalian Glycogen Synthase Kinase 3                |
| YOR039W | CKB2         | casein kinase II beta' chain                                           |
| YOR061W | CKA2         | casein kinase II alpha' chain                                          |
| YOR070C | GYP1         | GTPase activating protein for Ypt1p and Sec4p                          |
| YOR089C | VPS21        | GTP-binding protein                                                    |
| YOR094W | ARF3         | ADP-ribosylation factor 3                                              |
| YOR101W | RAS1         | GTP-binding protein                                                    |
| YOR107W | RGS2         | negative regulator of glucose-induced cAMP signaling pathway           |
| YOR109W | INP53        | phosphatidylinositol phosphate phosphatase                             |
| YOR127W | RGA1         | RHO-type GTPase-activating protein for Cdc42p                          |
| YOR134W | BAG7         | structural homolog of Sac7p                                            |
| YOR149C | SMP3         | protein kinase C pathway protein                                       |
| YOR181W | LAS17        | component of actin cortical patches                                    |
| YOR185C | GSP2         | GTP-binding protein of the RAS superfamily                             |
| YOR188W | MSB1         | morphogenesis-related protein                                          |
| YOR208W | PTP2         | protein-tyrosine-phosphatase                                           |
| YOR211C | MGM1         | dynammin-like protein                                                  |
| YOR212W | STE4         | GTP-binding protein beta subunit of the pheromone pathway              |
| YOR231W | MKK1         | ser/thr protein kinase                                                 |
| YOR233W | KIN4         | ser/thr protein kinase                                                 |
| YOR267C | HRK1         | Hygromycin Resistance Kinase                                           |
| YOR287C | not assigned | weak similarity to PITSLRE protein kinase isoforms                     |
| YOR351C | MEK1         | ser/thr protein kinase                                                 |
| YPL016W | SWI1         | component of SWI/SNF global transcription activator complex            |
| YPL026C | SKS1         | suppressor kinase of snf3                                              |
| YPL031C | PHO85        | cyclin-dependent protein kinase                                        |
| YPL042C | SSN3         | cyclin-dependent CTD kinase                                            |

|         |              |                                                             |
|---------|--------------|-------------------------------------------------------------|
| YPL051W | ARL3         | ADP-ribosylation factor-like protein, member of the arf-sar |
| YPL115C | BEM3         | GTPase-activating protein for Cdc42p and Rho1p              |
| YPL140C | MKK2         | protein kinase of the map kinase kinase (MEK) family        |
| YPL141C | not assigned | strong similarity to protein kinase Kin4p                   |
| YPL150W | not assigned | similarity to ser/thr protein kinases                       |
| YPL153C | RAD53        | ser/thr/tyr protein kinase                                  |
| YPL161C | BEM4         | bud emergence protein                                       |
| YPL174C | NIP100       | component of the dynactin complex                           |
| YPL203W | TPK2         | cAMP-dependent protein kinase 2, catalytic chain            |
| YPL204W | HRR25        | casein kinase I, ser/thr/tyr protein kinase                 |
| YPL209C | IPL1         | ser/thr protein kinase                                      |
| YPL218W | SAR1         | GTP-binding protein of the ARF family                       |
| YPL236C | not assigned | similarity to Prk1p, and serine/threonine protein kinase    |
| YPL246C | RBD2         | rhomboid protease                                           |
| YPL249C | GYP5         | GTPase activating protein                                   |
| YPL256C | CLN2         | cyclin, G1/S-specific                                       |
| YPL268W | PLC1         | 1-phosphatidylinositol-4,5-bisphosphate phosphodiesterase   |
| YPR017C | DSS4         | GDP/GTP exchange factor for Sec4p                           |
| YPR048W | TAH18        | similarity to M.domestica NADPH-ferrihemoprotein reductase  |
| YPR055W | SEC8         | protein transport protein                                   |
| YPR073C | LTP1         | protein-tyrosine-phosphatase                                |
| YPR106W | ISR1         | protein kinase                                              |
| YPR111W | DBF20        | cell cycle protein kinase related to Dbf2p                  |
| YPR161C | SGV1         | ser/thr protein kinase                                      |
| YPR165W | RHO1         | GTP-binding protein of the rho subfamily of ras-like        |
| YPT10   | YPT10        | similarity to GTP-binding proteins                          |
| YPT11   | YPT32        | small GTP-binding protein essential for Golgi function      |
| YPT32   | YPT32        | small GTP-binding protein essential for Golgi function      |
